# Supplementary material for: A new application of multiplex PCR combined with membrane biochip assay for rapid detection of 9 common pathogens in sepsis
Source: PeerJ journal article supplement (doi:10.7717/peerj.15325), 2023-05-12
Supplement: RawData1.zip [file RawData1.zip]

## Sheet: Sheet1
Number	gender	age	Membrane chip detection		Blood culture
WF-001	male	70	negative		negative
WF-002	female	24	negative		negative
WF-003	male	46	Klebsiella pneumoniae		Klebsiella pneumoniae
WF-004	female	25	negative		negative
WF-005	male	47	negative		negative
WF-006	female	53	negative		negative
WF-007	male	37	Streptococcus pneumoniae		Streptococcus pneumoniae
WF-008	male	66	negative		negative
WF-009	male	32	negative		negative
WF-010	female	44	negative		negative
WF-011	male	46	negative		negative
WF-012	male	43	negative		negative
WF-013	female	32	Escherichia coli		Escherichia coli
WF-014	female	55	negative		negative
WF-015	female	26	negative		negative
WF-016	female	52	negative		negative
WF-017	male	21	negative		negative
WF-018	female	58	negative		negative
WF-019	male	55	negative		Klebsiella ornithinolytica
WF-020	male	45	negative		negative
WF-021	male	29	negative		negative
WF-022	male	25	negative		negative
WF-023	male	82	negative		negative
WF-024	male	63	negative		negative
WF-025	male	17	negative		Enterococcus faecium
WF-026	male	35	negative		negative
WF-027	female	55	negative		negative
WF-028	male	52	negative		negative
WF-029	male	59	negative		negative
WF-030	male	75	negative		negative
WF-031	male	77	Staphylococcus epidermidis		Staphylococcus epidermidis
WF-032	female	62	negative		negative
WF-033	female	52	negative		negative
WF-034	male	74	negative		negative
WF-035	female	92	Escherichia coli		Escherichia coli
WF-036	male	62	negative		negative
WF-037	male	46	Escherichia coli		Escherichia coli
WF-038	female	27	negative		negative
WF-039	male	16	negative		negative
WF-040	male	66	negative		negative
WF-041	female	15	negative		negative
WF-042	male	21	negative		negative
WF-043	male	47	negative		negative
WF-044	female	21	negative		negative
WF-045	male	62	negative		negative
WF-046	male	53	Escherichia coli		Escherichia coli
WF-047	male	59	negative		negative
WF-048	female	61	negative		negative
WF-049	male	87	negative		negative
WF-050	male	21	negative		negative
WF-051	male	28	negative		negative
WF-052	female	55	negative		negative
WF-053	female	33	Klebsiella pneumoniae		Klebsiella pneumoniae
WF-054	male	27	negative		negative
WF-055	male	84	negative		negative
WF-056	female	55	Escherichia coli		negative
WF-057	male	49	negative		negative
WF-058	male	15	negative		negative
WF-059	female	58	negative		negative
WF-060	male	36	negative		negative
WF-061	male	57	negative		Enterobacter aerogenes
WF-062	female	36	negative		negative
WF-063	male	47	Acinetobacter baumannii		Acinetobacter baumannii
WF-064	female	63	negative		negative
WF-065	female	44	negative		Stenotrophomonas maltophilia
WF-066	male	51	negative		negative
WF-067	male	60	negative		negative
WF-068	female	29	negative		negative
WF-069	male	59	negative		negative
WF-070	female	40	negative		negative
WF-071	male	14	Enterococcus faecalis		Enterococcus faecalis
WF-072	male	57	negative		negative
WF-073	male	44	negative		Escherichia coli
WF-074	female	14	negative		negative
WF-075	male	31	Pseudomonas aeruginosa		Pseudomonas aeruginosa
WF-076	female	63	Klebsiella pneumoniae		negative
WF-077	male	42	negative		negative
WF-078	female	45	negative		negative
WF-079	male	38	negative		negative
WF-080	female	26	negative		negative
WF-081	female	36	negative		negative
WF-082	male	34	Staphylococcus epidermidis		Staphylococcus epidermidis
WF-083	male	38	negative		negative
WF-084	female	55	negative		negative
WF-085	female	81	negative		negative
WF-086	male	44	negative		negative
WF-087	female	51	Staphylococcus aureus		Staphylococcus aureus
WF-088	female	54	negative		negative
WF-089	male	55	negative		negative
WF-090	female	51	negative		negative
WF-091	male	44	Candida albicans		Candida albicans
WF-092	female	78	negative		negative
WF-093	female	30	negative		negative
WF-094	male	15	negative		negative
WF-095	male	32	negative		negative
WF-096	male	34	negative		negative
WF-097	male	19	negative		negative
WF-098	male	55	Staphylococcus epidermidis		Staphylococcus epidermidis
WF-099	female	30	negative		negative
WF-100	male	41	negative		negative
WF-101	female	47	Staphylococcus aureus		Staphylococcus aureus
WF-102	male	63	Pseudomonas aeruginosa		Pseudomonas aeruginosa
WF-103	male	25	negative		negative
WF-104	male	71	negative		negative
WF-105	male	37	negative		negative
WF-106	male	58	negative		negative
WF-107	female	33	negative		negative
WF-108	male	61	negative		negative
WF-109	female	61	negative		negative
WF-110	female	31	Acinetobacter baumannii		Acinetobacter baumannii
WF-111	male	70	negative		negative
WF-112	female	60	negative		negative
WF-113	female	55	Enterococcus faecalis		Enterococcus faecalis
WF-114	male	36	negative		negative
WF-115	female	31	negative		negative
WF-116	male	71	negative		Escherichia hermannii
WF-117	female	22	negative		negative
WF-118	male	27	negative		negative
WF-119	male	28	negative		negative
WF-120	male	75	negative		Klebsiella pneumoniae
WF-121	female	67	negative		negative
WF-122	female	54	negative		negative
WF-123	male	65	Klebsiella pneumoniae		Klebsiella pneumoniae
WF-124	female	43	negative		negative
WF-125	female	55	negative		negative
WF-126	male	69	negative		negative
WF-127	female	47	negative		negative
WF-128	male	70	negative		negative
WF-129	female	52	Acinetobacter baumannii		Acinetobacter baumannii
WF-130	male	67	negative		negative
WF-131	male	26	negative		negative
WF-132	female	28	negative		negative
WF-133	male	60	negative		negative
WF-134	female	71	negative		negative
WF-135	male	54	Pseudomonas aeruginosa		Pseudomonas aeruginosa
WF-136	female	64	negative		negative
WF-137	female	37	negative		negative
WF-138	female	57	negative		negative
WF-139	male	48	Staphylococcus aureus		Staphylococcus aureus
WF-140	male	54	negative		negative
WF-141	male	69	negative		negative
WF-142	male	60	negative		negative
WF-143	male	50	negative		negative
WF-144	female	58	negative		negative
WF-145	male	44	negative		negative
WF-146	female	35	Escherichia coli		Escherichia coli
WF-147	female	61	negative		negative
WF-148	male	62	negative		negative
WF-149	female	55	negative		negative
WF-150	male	54	negative		negative
WF-151	male	54	negative		negative
WF-152	female	29	negative		negative
WF-153	female	54	negative		negative
WF-154	male	64	negative		negative
WF-155	male	50	Klebsiella pneumoniae		Klebsiella pneumoniae
WF-156	male	54	negative		negative
WF-157	male	67	negative		negative
WF-158	male	52	negative		negative
WF-159	female	46	negative		negative
WF-160	male	41	negative		negative
WF-161	male	75	negative		negative
WF-162	male	64	Acinetobacter baumannii		Acinetobacter baumannii
WF-163	female	24	negative		negative
WF-164	female	65	negative		negative
WF-165	male	55	negative		negative
WF-166	male	68	negative		negative
WF-167	male	55	negative		negative
WF-168	female	61	negative		negative
WF-169	male	52	Streptococcus pneumoniae		negative
WF-170	male	67	Escherichia coli		negative
WF-171	female	49	negative		negative
WF-172	female	71	Acinetobacter baumannii		negative
WF-173	male	28	Staphylococcus aureus		negative
WF-174	female	65	Enterococcus faecalis		negative
WF-175	female	22	negative		negative
WF-176	male	65	negative		negative
WF-177	male	55	Staphylococcus epidermidis		negative
WF-178	male	60	Klebsiella pneumoniae		negative
WF-179	male	50	Escherichia coli		negative
